# Supplementary material for: On-target restoration of a split T cell-engaging antibody for precision immunotherapy
Source: PubMed Central journal article supplement (PMC6879491; doi:10.1038/s41467-019-13196-0), 2019-11-26
Supplement: 41467_2019_13196_MOESM1_ESM.pdf [file 41467_2019_13196_MOESM1_ESM.pdf]

**Supplementary Information:**

**a**

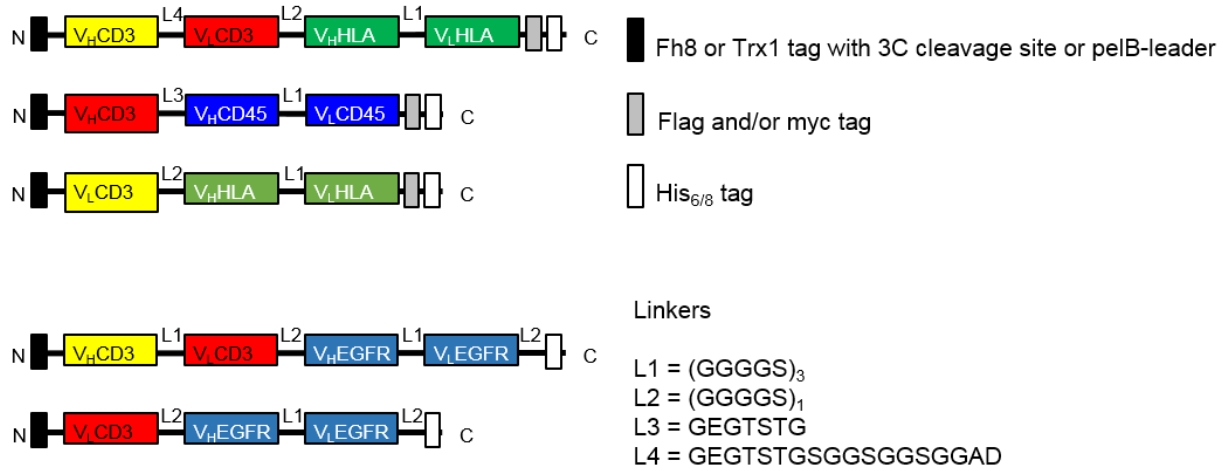

**b**

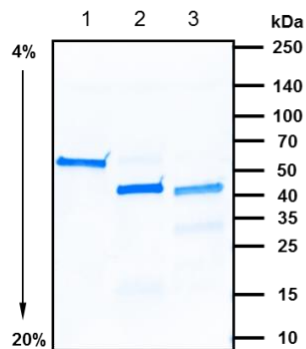

**c**

| construct                       | Total amount [mg]/10l | Purity [%] |
|---------------------------------|-----------------------|------------|
| scFvαCD3-scFvαHLA-A2            | 2.6                   | 93         |
| V <sub>H</sub> αCD3-scFvαCD45   | 2.5                   | 86         |
| V <sub>L</sub> αCD3-scFvαHLA-A2 | 1.5                   | 64         |

**Supplementary Figure 1. (a)** Schematic representation of the constructs used in this study. **(b)** SDS-PAGE analysis of hemibody constructs. 1 μg of scFvαCD3-scFvαHLA-A2 (1), V<sub>H</sub>αCD3-scFvαCD45 (2) and V<sub>L</sub>αCD3-scFvαHLA-A2 (3) SEC-purified construct was subjected to gradient SDS-PAGE under reducing conditions followed by Coomassie staining, a typical profile is shown

(c) Table summarizing yields of SEC-purified constructs. Protein amounts are from *E. coli* broth with an average OD<sub>600</sub> of 5.0.

**Supplementary Figure 2: Long term stability.**

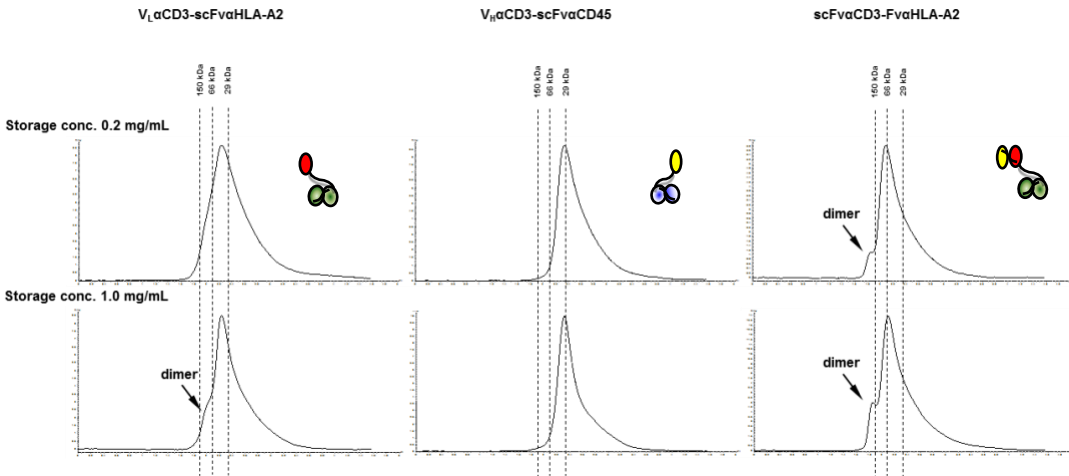

SEC purified constructs were stored at the given concentrations over a period of one month at 2-8°C in diluent buffer. Subsequently, samples were analyzed by size exclusion chromatography (SEC). SEC conditions: Sample volume loaded on column = 50 μL, Column = Superdex200 Increase 5/150 GL, running buffer = diluent buffer, flow rate = 0.4 mL/min, temperature = RT, diluent buffer = 50mM Na phosphate pH7.5, 300 mM NaCl, typical profiles are shown.

**Supplementary Figure 3**

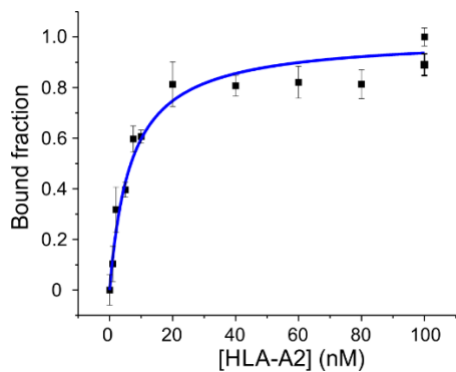

**Binding isotherm of VLαCD3-scFvαHLA-A2/HLA-A2 interaction:** : Diffusion time constants measured by FCS of 1nM VLαCD3-scFvαHLA-A2 in presence of increasing concentration of

HLA-A2 antigens, normalized to the fraction of bound V<sub>L</sub>αCD3-scFvαHLA-A2. The blue line is a fit to the data using the conventional model for a bi-molecular binding isotherm.

**Supplementary Table 1: Estimated group size for the NSG mouse model.**

---

Group size for experiments in the NSG mouse model:

---

|                          |      |      |      |      |      |      |
|--------------------------|------|------|------|------|------|------|
| Mice per group           | 5    | 6    | 7    | 8    | 9    | 10   |
| Effectsize <sup>1</sup>  | 2.0  | 1.8  | 1.6  | 1.5  | 1.4  | 1.3  |
| SD fraction <sup>2</sup> | 0.49 | 0.56 | 0.61 | 0.66 | 0.71 | 0.75 |

<sup>1</sup>mean difference in standard deviation (SD) units detectable with 80% power at 2-sided 0.05 level of significance with 2-sample t-test;  
<sup>2</sup>SD as a fraction of biologically meaningful difference (inverse of effect size).

---

The sample size to achieve statistically significant data for this model was calculated based on an estimated effect size of 2 according to Ms. Katherine Guthrie, Fred Hutchinson Cancer Research Center, Seattle, USA, using GPOWER 3.1.2 <sup>1</sup>.

**References for Supplementary Figures and Material**

1. Erdfelder, E., Faul, F., & Buchner, A. GPOWER: A general power analysis program. *Behavior Research Methods, Instruments, & Computers* **28**, 1-11. (1996).
