# Supplementary material for: On-target restoration of a split T cell-engaging antibody for precision immunotherapy
Source: PubMed Central journal article supplement (PMC6879491; doi:10.1038/s41467-019-13196-0), 2019-11-26
Supplement: 41467_2019_13196_MOESM2_ESM.pdf [file 41467_2019_13196_MOESM2_ESM.pdf]

## Reporting Summary

Nature Research wishes to improve the reproducibility of the work that we publish. This form provides structure for consistency and transparency in reporting. For further information on Nature Research policies, see [Authors & Referees](#) and the [Editorial Policy Checklist](#).

### Statistics

For all statistical analyses, confirm that the following items are present in the figure legend, table legend, main text, or Methods section.

n/a Confirmed

- |                                     |                                     |                                                                                                                                                                                                                                                            |
|-------------------------------------|-------------------------------------|------------------------------------------------------------------------------------------------------------------------------------------------------------------------------------------------------------------------------------------------------------|
| <input type="checkbox"/>            | <input checked="" type="checkbox"/> | The exact sample size ( $n$ ) for each experimental group/condition, given as a discrete number and unit of measurement                                                                                                                                    |
| <input type="checkbox"/>            | <input checked="" type="checkbox"/> | A statement on whether measurements were taken from distinct samples or whether the same sample was measured repeatedly                                                                                                                                    |
| <input type="checkbox"/>            | <input checked="" type="checkbox"/> | The statistical test(s) used AND whether they are one- or two-sided<br><i>Only common tests should be described solely by name; describe more complex techniques in the Methods section.</i>                                                               |
| <input checked="" type="checkbox"/> | <input type="checkbox"/>            | A description of all covariates tested                                                                                                                                                                                                                     |
| <input checked="" type="checkbox"/> | <input type="checkbox"/>            | A description of any assumptions or corrections, such as tests of normality and adjustment for multiple comparisons                                                                                                                                        |
| <input checked="" type="checkbox"/> | <input type="checkbox"/>            | A full description of the statistical parameters including central tendency (e.g. means) or other basic estimates (e.g. regression coefficient) AND variation (e.g. standard deviation) or associated estimates of uncertainty (e.g. confidence intervals) |
| <input checked="" type="checkbox"/> | <input type="checkbox"/>            | For null hypothesis testing, the test statistic (e.g. $F$ , $t$ , $r$ ) with confidence intervals, effect sizes, degrees of freedom and $P$ value noted<br><i>Give <math>P</math> values as exact values whenever suitable.</i>                            |
| <input checked="" type="checkbox"/> | <input type="checkbox"/>            | For Bayesian analysis, information on the choice of priors and Markov chain Monte Carlo settings                                                                                                                                                           |
| <input checked="" type="checkbox"/> | <input type="checkbox"/>            | For hierarchical and complex designs, identification of the appropriate level for tests and full reporting of outcomes                                                                                                                                     |
| <input type="checkbox"/>            | <input checked="" type="checkbox"/> | Estimates of effect sizes (e.g. Cohen's $d$ , Pearson's $r$ ), indicating how they were calculated                                                                                                                                                         |

*Our web collection on [statistics for biologists](#) contains articles on many of the points above.*

### Software and code

Policy information about [availability of computer code](#)

Data collection

Mouse experiments: Living Image Software 4.5.5, In vitro Assays: ImageLa, Tecan SPARKCONTROL Method Editor V2.2, Unicorn V 6.3

Data analysis

Mouse experiments: Living Image Software 4.5.5, In vitro Assays: FlowJo V 8.8.6/V10, ImageLab, GraphPad Prism V 7, Unicorn V 6.3

For manuscripts utilizing custom algorithms or software that are central to the research but not yet described in published literature, software must be made available to editors/reviewers. We strongly encourage code deposition in a community repository (e.g. GitHub). See the Nature Research [guidelines for submitting code & software](#) for further information.

### Data

Policy information about [availability of data](#)

All manuscripts must include a [data availability statement](#). This statement should provide the following information, where applicable:

- Accession codes, unique identifiers, or web links for publicly available datasets
- A list of figures that have associated raw data
- A description of any restrictions on data availability

Sequence data from all engineered constructs are submitted to GenBank. The datasets are available from the corresponding author upon reasonable request.

## Field-specific reporting

Please select the one below that is the best fit for your research. If you are not sure, read the appropriate sections before making your selection.

- Life sciences       Behavioural & social sciences       Ecological, evolutionary & environmental sciences

For a reference copy of the document with all sections, see [nature.com/documents/nr-reporting-summary-flat.pdf](http://nature.com/documents/nr-reporting-summary-flat.pdf)

## Life sciences study design

All studies must disclose on these points even when the disclosure is negative.

|                 |                                                                                                                                           |
|-----------------|-------------------------------------------------------------------------------------------------------------------------------------------|
| Sample size     | 2 to 6 female mice of same age per group as indicated in respective figures                                                               |
| Data exclusions | No relevant data was excluded                                                                                                             |
| Replication     | Functional assays were performed in duplicates or triplicates. Flow cytometry analyses were derived from healthy volunteers as indicated. |
| Randomization   | Allocation of samples/animals into experimental groups was random                                                                         |
| Blinding        | blinding was not possible to ensure correct treatment and grouping.                                                                       |

## Reporting for specific materials, systems and methods

We require information from authors about some types of materials, experimental systems and methods used in many studies. Here, indicate whether each material, system or method listed is relevant to your study. If you are not sure if a list item applies to your research, read the appropriate section before selecting a response.

### Materials & experimental systems

| n/a                                 | Involvement in the study                                        |
|-------------------------------------|-----------------------------------------------------------------|
| <input type="checkbox"/>            | <input checked="" type="checkbox"/> Antibodies                  |
| <input type="checkbox"/>            | <input checked="" type="checkbox"/> Eukaryotic cell lines       |
| <input checked="" type="checkbox"/> | <input type="checkbox"/> Palaeontology                          |
| <input type="checkbox"/>            | <input checked="" type="checkbox"/> Animals and other organisms |
| <input checked="" type="checkbox"/> | <input type="checkbox"/> Human research participants            |
| <input checked="" type="checkbox"/> | <input type="checkbox"/> Clinical data                          |

### Methods

| n/a                                 | Involvement in the study                           |
|-------------------------------------|----------------------------------------------------|
| <input checked="" type="checkbox"/> | <input type="checkbox"/> ChIP-seq                  |
| <input type="checkbox"/>            | <input checked="" type="checkbox"/> Flow cytometry |
| <input checked="" type="checkbox"/> | <input type="checkbox"/> MRI-based neuroimaging    |

## Antibodies

|                 |                                                                                                             |
|-----------------|-------------------------------------------------------------------------------------------------------------|
| Antibodies used | anti-HLA-A2-APC (Biolegend, mouse IgG2b) , Rabbit anti-active Caspase-3-PE (BD Biosciences, clone C92-605). |
| Validation      | antibodies have been validated by manufacturer                                                              |

## Eukaryotic cell lines

Policy information about [cell lines](#)

|                                                                      |                                                                                             |
|----------------------------------------------------------------------|---------------------------------------------------------------------------------------------|
| Cell line source(s)                                                  | Jurkat, U266, KMS-12-BM, THP-1, Raji, HT1080, MDA-MB 231: DMSZ and ATCC as reported in M&M. |
| Authentication                                                       | Authentication by provider                                                                  |
| Mycoplasma contamination                                             | All cell lines were tested negative for mycoplasma contamination.                           |
| Commonly misidentified lines<br>(See <a href="#">ICLAC</a> register) | -                                                                                           |

## Animals and other organisms

Policy information about [studies involving animals](#); [ARRIVE guidelines](#) recommended for reporting animal research

|                         |                                                                                                                                                                                                                                                                                                                                                                                                                                                 |
|-------------------------|-------------------------------------------------------------------------------------------------------------------------------------------------------------------------------------------------------------------------------------------------------------------------------------------------------------------------------------------------------------------------------------------------------------------------------------------------|
| Laboratory animals      | Immune deficient NOD scid Il2rg <sup>-/-</sup> (NSG mice, stock number 5557), female<br>BalB/c mice (stock number 028), female<br>Immune deficient NOD-Prkdcem26Cd52 Il2rgem26Dc22/NjuCrl (NCG) mice, female<br>All mice were purchased from The Jackson Laboratory (Bar Harbor, Maine, USA) and maintained in a certified animal facility (ZEMM, center for experimental molecular medicine, Würzburg) in accordance with European guidelines. |
| Wild animals            | No wild animals were involved in this study.                                                                                                                                                                                                                                                                                                                                                                                                    |
| Field-collected samples | This study did not involve field-collected samples.                                                                                                                                                                                                                                                                                                                                                                                             |

## Ethics oversight

Animal experiments have been approved by the appropriate authorities and performed at the ZEMM, center for experimental molecular medicine, Würzburg (experiment number: 2-2544-24) or Charles River Discovery Research Services Germany GmbH (Freiburg, Germany)

Note that full information on the approval of the study protocol must also be provided in the manuscript.

## Flow Cytometry

### Plots

Confirm that:

- The axis labels state the marker and fluorochrome used (e.g. CD4-FITC).
- The axis scales are clearly visible. Include numbers along axes only for bottom left plot of group (a 'group' is an analysis of identical markers).
- All plots are contour plots with outliers or pseudocolor plots.
- A numerical value for number of cells or percentage (with statistics) is provided.

### Methodology

Sample preparation

PBMC from HLA-A2 negative healthy donors were mixed for 4h with tumor cell lines and repective antibody constructs, followed by surface staining and intracellular caspase-3 staining.

Instrument

BD-FACS Canto-II

Software

FlowJo (Trestar)

Cell population abundance

n.a.

Gating strategy

Cell were gated according to light scatter and HLA-A2 expression (as shown in the Figure).

- Tick this box to confirm that a figure exemplifying the gating strategy is provided in the Supplementary Information.
